# Supplementary material for: A DNAzyme cascade for the amplified detection of Pb2+ ions or l-histidine
Source: Royal Society of Chemistry journal article supplement (doi:10.1039/b716774a), 2008-01-01
Supplement: b716774a.pdf [file b716774a.pdf]

## A DNzyme Cascade for the Amplified Detection of $\text{Pb}^{2+}$ Ions or L-Histidine

Johann Elbaz, Bella Shlyahovsky, and Itamar Willner\*

### Supporting Information

The composition of the system for analyzing  $\text{Pb}^{2+}$  was optimized by different ratios of (1) and (2). We studied the following ratios: 1:1, 2:1, 4:1, 6:1, 8:1. This studies were aimed to detect the ratio of the components at which the horseradish peroxidase mimicking DNzyme is fully blocked in the form of the (1):(2) complex, and the background color or chemiluminescence are essentially generated by free hemin. Figure 1S depicts the experimented results.

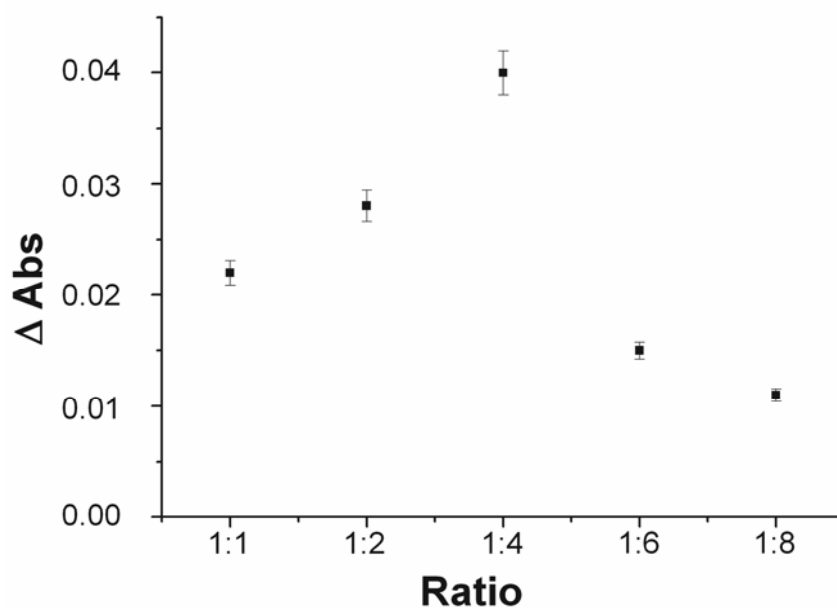

**Figure 1S:** Absorbance changes corresponding to the difference between the absorbance generated after 2.5 minutes by the system consisting of the respective ratio of (1) and (2) in the presence of  $\text{Pb}^{2+}$ ,  $1 \times 10^{-5}$  M, and the absorbance generated after 2.5 minutes by the system consisting of (1) and (2) in the absence of  $\text{Pb}^{2+}$ .
